# Supplementary material
Source: PubMed Central journal article supplement (PMC8612983)
Supplement: NIHMS1743361-supplement-1.pdf [file NIHMS1743361-supplement-1.pdf]

| SLE:         |        |     |                |       |                                      |        |        |        |             |           |                                                          |          |
|--------------|--------|-----|----------------|-------|--------------------------------------|--------|--------|--------|-------------|-----------|----------------------------------------------------------|----------|
| Demographics |        |     | % CD11c+ CD21- |       | Lupus-Associated Antibodies (ever +) |        |        |        |             |           | Lupus Activity                                           | Rx       |
| Age          | Race   | Sex | DN             | Naive | ANA                                  | R<br>o | L<br>a | S<br>m | R<br>N<br>P | ds<br>DNA | SLEDAI                                                   |          |
| 64           | NH, AA | F   | 46.0           | 1.3   | 640 H                                | -      | -      | -      | -           | +         | 0                                                        | P2       |
| 35           | NH, AA | F   | 74.7           | 5.4   | 640 S                                | +      | +      | +      | +           | +         | 12 (arthritis, proteinuria, low complements, anti-dsDNA) | H, A     |
| 34           | NH, AA | F   | 15.5*          | 1.9   | 640 S                                | +      | -      | -      | +           | -         | 2 (new rash)                                             | H        |
| 61           | NH, C  | F   | 9.2            | 0.3   | 80 H                                 | -      | -      | -      | -           | +         | 2 (anti-dsDNA)                                           | H, A     |
| 24           | NH, AA | M   | 7.0            | 1.0   | 2560 S                               | -      | -      | +      | +           | +         | 4 (low complements anti-dsDNA)                           | H        |
| 50           | NH, AA | F   | 25.5           | 2.5   | >2560 S                              | +      | +      | +      | +           | +         | 2 (anti-dsDNA)                                           | H        |
| 50           | NH, AA | F   | 62.5           | 10.2  | 640 H                                | +      | -      | -      | +           | +         | 0                                                        | H, M, P1 |
| 69           | NH, C  | F   | 4.8            | 0.37  | 160 S                                | -      | -      | -      | -           | +         | 8 (low complements, proteinuria, & anti-ds DNA)          | H        |
| HD:          |        |     |                |       |                                      |        |        |        |             |           |                                                          |          |
| 58           | NH, C  | F   | 8.0            | 0.1   |                                      |        |        |        |             |           |                                                          |          |
| 49           | NH, AA | M   | 3.6*           | 0.8   |                                      |        |        |        |             |           |                                                          |          |
| 39           | NH, C  | F   | 8.5            | 0.7   |                                      |        |        |        |             |           |                                                          |          |
| 36           | H, C   | M   | 9.4            | 0.7   |                                      |        |        |        |             |           |                                                          |          |
| 37           | NH, C  | F   | 8.1            | 0.6   |                                      |        |        |        |             |           |                                                          |          |

**Supplemental Table 1: Demographic data for transcriptomic analysis cohort.** Peripheral blood from this cohort was flow sorted into monocytes, double negative B cells (DN), and naïve B cells. For the double negative B cell samples, one SLE and one healthy donor had to be excluded due to poor RNA quality (\*). Abbreviations: Race (H = Hispanic ethnicity, NH = non-Hispanic ethnicity, AA = African American, C = Caucasian). Sex (F = female, M = male). ANA = antinuclear antibody titer (H = homogeneous pattern, S = speckled pattern). Rx = lupus medications at the time of blood draw (H = hydroxychloroquine, A = azathioprine, M = mycophenolic acid, P1 = prednisone 1mg daily, P2 prednisone 2mg daily).

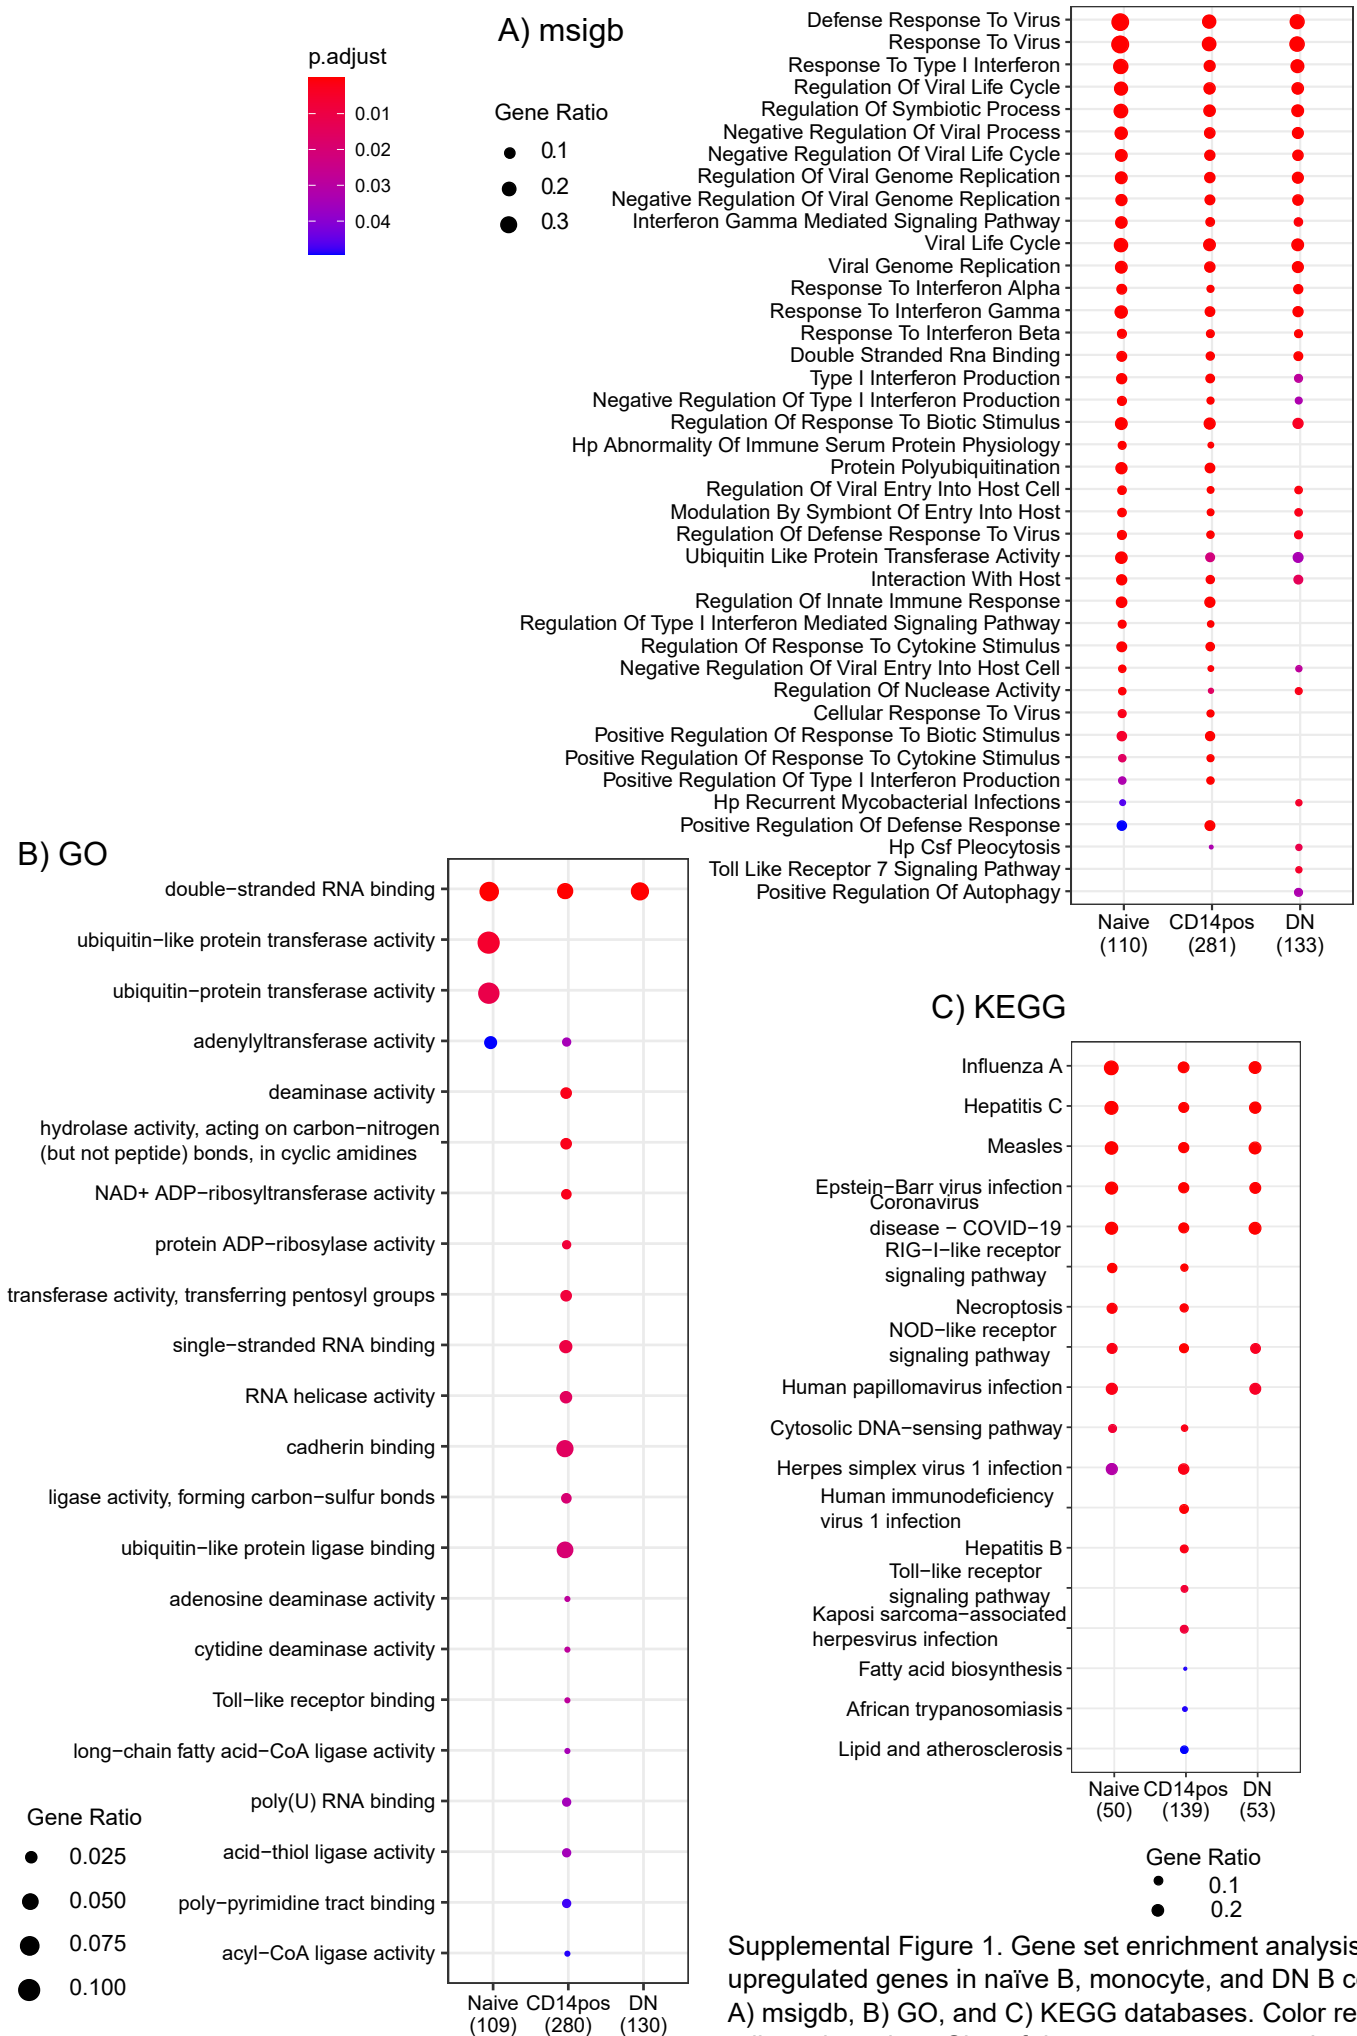

Supplemental Figure 1. Gene set enrichment analysis for SLE upregulated genes in naïve B, monocyte, and DN B cells utilizing A) msigdb, B) GO, and C) KEGG databases. Color represents adjusted p-value. Size of dot represents gene ratio.

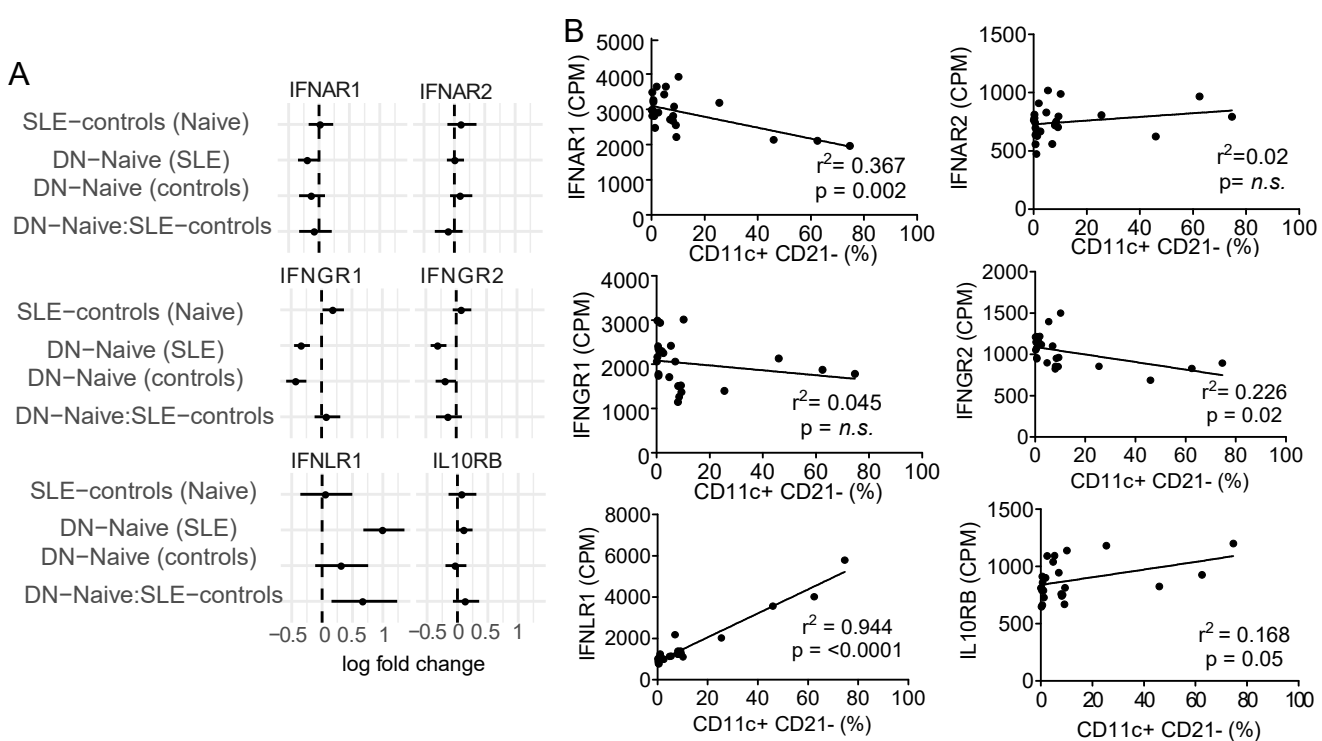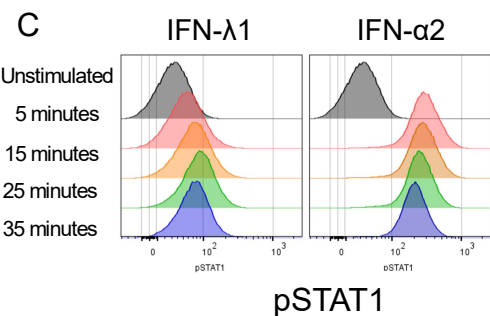

Supplemental Figure 2: A) IFN Receptor Gene Transcripts.

Coefficients and 95% credible intervals for regressions with subject-level random effect and fixed effects for disease status, B cell subset and its interaction. B) Linear regression for Type I, Type II, and Type III IFN receptor transcripts from bulk RNA-seq (normalized CPM) with CD11c+ CD21- (% cells) frequency in each sample. Naïve and DN from both HD and SLE are displayed for each graph. Goodness of fit ( $r^2$ ) and p-value (F test) shown. C) Peripheral blood mononuclear cells stimulated with IFN- $\alpha$ 2 or IFN- $\lambda$ 1 for 0-35 minutes for detection of phosphorylated STAT1 protein by flow cytometry. Histograms shown for CD19+ CD20+ B cells.
